# Supplementary material
Source: PubMed Central journal article supplement (PMC3009926)

## SUPPLEMENTAL MATERIALS

**Supplemental Table 1.** Effects of pH on myelin stability in sciatic nerves for S34C transgenic mice.

**Supplemental Figure 1.** X-ray diffraction data from unembedded, glutaraldehyde-fixed sciatic nerves from WT and S63C mice. The nerves were fixed by immersion in 2% glutaraldehyde in 0.12 M phosphate buffer at pH 7.4. X-ray exposure times were 1 hour. **(A)** X-ray patterns from WT (black) and S63C (red) show that the peaks superpose closely, but are weaker in the latter, indicating less relative amount of myelin. **(B)** Scatterplot of  $M/(M+B)$  vs. periodicity  $d$  indicates consistent hypomyelination in the S63C myelin.

**Supplemental Figure 2.** X-ray diffraction data from unfixed sciatic nerves at physiological pH for the genotypes examined in this paper, expressed as a scatterplot of  $M/(M+B)$  vs. periodicity  $d$ . The data have been assembled from Tables 1-4, and include only the major diffracting phase. The error bars are standard deviations. Note that myelin with P0S34C is more adhesive than P0+/-, as indicated by the smaller period. At higher concentrations of P0S34C, the *trans* disulfide bonds form, resulting in a vastly greater periodicity than either P0+/- or P0-/- myelin. The inset indicates the p-values for significance levels comparing different pairs of the genotypes. Values above and below the diagonal line pertain, respectively, to myelin periodicity ( $d$ ) and to the relative amount of myelin ( $M/M+B$ ).

**Supplemental Figure 3.** The 50 kDa band was P0-specific. Protein extracts from WT, S63C(+/+) and P0-/- sciatic nerves were subjected to SDS-PAGE under reducing or non-reducing conditions. Neither the 27-30 nor the 50 kDa (*arrow*) bands were detected in the samples from P0-/- mice, suggesting that these bands are specific for P0.

**Supplemental Figure 4.** MALDI-TOF analysis of the P0wt and dimer bands that were excised as indicated in Figure 5C. Datasets and spectra for the analysis are included here.

**Supplemental Table 1.** Effects of pH on myelin stability in sciatic nerves for S63C transgenic mice

| pH               | Dimension (Å) |            |            |            | % myelin | M/(M+B) |
|------------------|---------------|------------|------------|------------|----------|---------|
|                  | <i>d</i>      | <i>cyt</i> | <i>lpg</i> | <i>ext</i> |          |         |
| <b>WT</b>        |               |            |            |            |          |         |
| <b>6</b>         | 202.6         | 32         | 46         | 79         |          | 0.33    |
| <b>6.2</b>       | 173.1         | –          | –          | –          | 62%      | 0.34    |
|                  | 203.9         | –          | –          | –          | 38%      |         |
| <b>6.5</b>       | 174.5         | 31         | 48         | 48         | 97%      | 0.34    |
|                  | 212.4         | –          | –          | –          | 3%       |         |
| <b>6.6</b>       | 176.1         | 32         | 48         | 48         | 99%      | 0.28    |
|                  | 213.0         | –          | –          | –          | 1%       |         |
| <b>7</b>         | 175.9         | 31         | 50         | 45         |          | 0.27    |
| <b>7.2</b>       | 175.7         | 31         | 49         | 47         |          | 0.27    |
| <b>7.5</b>       | 174.7         | 31         | 49         | 46         |          | 0.30    |
| <b>7.6</b>       | 177.5         | 31         | 49         | 47         |          | 0.30    |
| <b>8</b>         | 202.6         | 32         | 49         | 48         |          | 0.16    |
| <b>S63C(+/+)</b> |               |            |            |            |          |         |
| <b>6</b>         | 202.3         | –          | –          | –          | 71%      | 0.18    |
|                  | 172.5         | –          | –          | –          | 29%      |         |
| <b>6.2</b>       | 200.0         | –          | –          | –          | 75%      | 0.25    |
|                  | 172.4         | –          | –          | –          | 25%      |         |
| <b>6.5</b>       | 172.1         | 34         | 45         | 48         | 53%      | 0.25    |
|                  | 204.4         | –          | –          | –          | 57%      |         |
| <b>6.5</b>       | 173.8         | 32         | 48         | 46         |          | 0.20    |
| <b>6.6</b>       | 173.5         | 31         | 48         | 47         | 96%      | 0.27    |
|                  | 212.4         | –          | –          | –          | 4%       |         |
| <b>7</b>         | 173.9         | 32         | 47         | 48         | 97%      | 0.21    |
|                  | 216.0         | –          | –          | –          | 3%       |         |
| <b>7.2</b>       | 173.6         | 31         | 48         | 47         |          | 0.28    |
| <b>7.5</b>       | 174.0         | 31         | 48         | 47         |          | 0.26    |
| <b>7.6</b>       | 174.8         | 31         | 48         | 48         |          | 0.22    |
| <b>8</b>         | 173.6         | 32         | 47         | 48         |          | 0.22    |
| <b>S63C(+/-)</b> |               |            |            |            |          |         |
| <b>6</b>         | 204.9         | 32         | 48         | 77         | 93%      | 0.23    |
|                  | 172.2         | –          | –          | –          | 7%       |         |
| <b>6.2</b>       | 200.0         | –          | –          | –          | 64%      | 0.26    |
|                  | 172.9         | –          | –          | –          | 36%      |         |
| <b>6.5</b>       | 174.1         | 33         | 46         | 49         | 83%      | 0.15    |
|                  | 207.1         | –          | –          | –          | 17%      |         |
| <b>6.6</b>       | 174.6         | 32         | 47         | 49         | 74%      | 0.23    |
|                  | 204.2         | –          | –          | –          | 26%      |         |
| <b>7</b>         | 173.2         | 33         | 46         | 48         | 74%      | 0.23    |
|                  | 216.0         | –          | –          | –          | 26%      |         |
| <b>7.2</b>       | 175.0         | 32         | 48         | 47         | 81%      | 0.25    |
|                  | 197.7         | –          | –          | –          | 5%       |         |
|                  | 234.1         | –          | –          | –          | 14%      |         |
| <b>7.5</b>       | 174.4         | 32         | 47         | 48         | 96%      | 0.22    |
|                  | 232.0         | –          | –          | –          | 4%       |         |
| <b>7.6</b>       | 176.0         | 32         | 48         | 48         | 85%      | 0.20    |
|                  | 197.0         | –          | –          | –          | 4%       |         |

|                  |       |    |    |    |     |      |
|------------------|-------|----|----|----|-----|------|
|                  | 220.0 | –  | –  | –  | 11% |      |
| <b>8</b>         | 176.8 | 32 | 49 | 47 |     | 0.13 |
| <b>S63C(-/-)</b> |       |    |    |    |     |      |
| <b>6</b>         | 205.9 | –  | –  | –  |     | 0.21 |
| <b>6.2</b>       | 204.3 | –  | –  | –  |     | 0.17 |
| <b>6.5</b>       | 206.1 | –  | –  | –  |     | 0.19 |
| <b>6.6</b>       | 203.8 | –  | –  | –  |     | 0.19 |
| <b>7</b>         | 207.8 | –  | –  | –  |     | 0.13 |
| <b>7.2</b>       | 215.2 | –  | –  | –  |     | 0.20 |
| <b>7.5</b>       | 211.3 | 33 | 46 | 86 |     | 0.19 |
| <b>7.6</b>       | 212.6 | –  | –  | –  |     | 0.14 |
| <b>8</b>         | 212.1 | –  | –  | –  |     | 0.09 |
| <b>P0+/-</b>     |       |    |    |    |     |      |
| <b>6</b>         | 205.8 | –  | –  | –  |     | 0.27 |
| <b>6.2</b>       | 205.0 | –  | –  | –  |     | 0.27 |
| <b>6.5</b>       | 204.1 | –  | –  | –  | 85% | 0.25 |
|                  | 180.4 |    |    |    | 15% |      |
| <b>6.6</b>       | 182.5 | 33 | 48 | 54 | 76% | 0.20 |
|                  | 202.5 | –  | –  | –  | 22% |      |
| <b>7</b>         | 211.3 | –  | –  | –  | 83% | 0.26 |
|                  | 178.9 | –  | –  | –  | 17% |      |
| <b>7.2</b>       | 179.7 | 33 | 48 | 51 | 68% | 0.27 |
|                  | 209.3 | –  | –  | –  | 32% |      |
| <b>7.5</b>       | 179.6 | 33 | 48 | 51 | 98% | 0.17 |
|                  | 216.1 | –  | –  | –  | 2%  |      |
| <b>7.6</b>       | 179.8 | 32 | 49 | 50 |     | 0.25 |
| <b>8</b>         | 179.9 | 32 | 48 | 52 |     | 0.22 |
| <b>P0-/-</b>     |       |    |    |    |     |      |
| <b>6</b>         | 179.5 | 31 | 45 | 59 |     | 0.04 |
| <b>6.2</b>       | 193.6 | –  | –  | –  |     | 0.04 |
| <b>6.5</b>       | 192.1 | –  | –  | –  |     | 0.03 |
| <b>6.6</b>       | 195.6 | –  | –  | –  |     | 0.05 |
| <b>7</b>         | 187.4 | 34 | 45 | 64 |     | 0.05 |
| <b>7.2</b>       | 196.9 | –  | –  | –  |     | 0.04 |
| <b>7.5</b>       | 190.7 | 33 | 45 | 68 |     | 0.04 |
| <b>7.6</b>       | 201.9 | –  | –  | –  |     | 0.04 |
| <b>8</b>         | 184.2 | 31 | 47 | 59 |     | 0.05 |

Myelin stability was assessed by XRD of nerves treated at physiological ionic strength, 154 mM NaCl, 5 mM phosphate buffer, and titrated to the various pHs as described in *Experimental Procedures*. See legend to Table 1 for details, and Fig. 3.

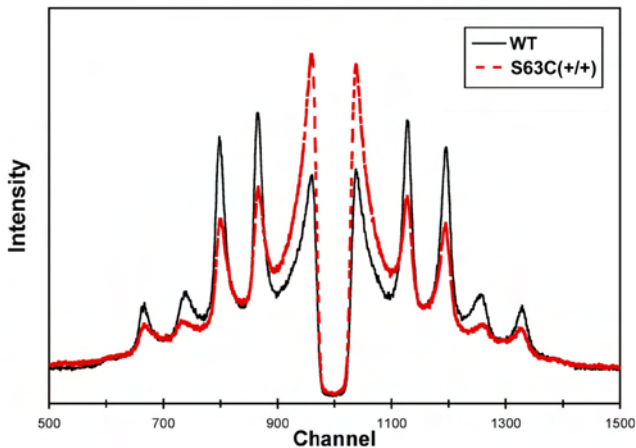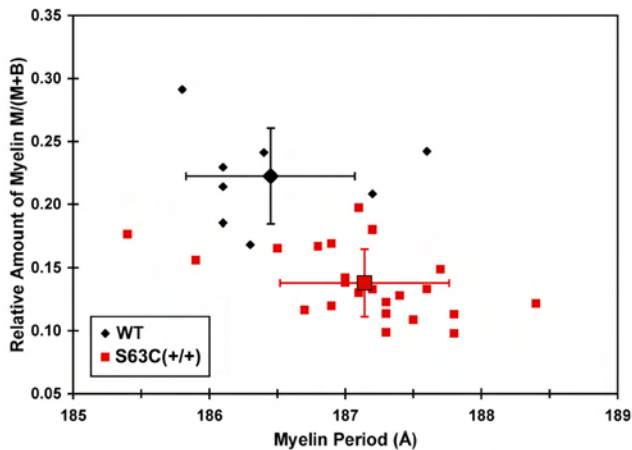

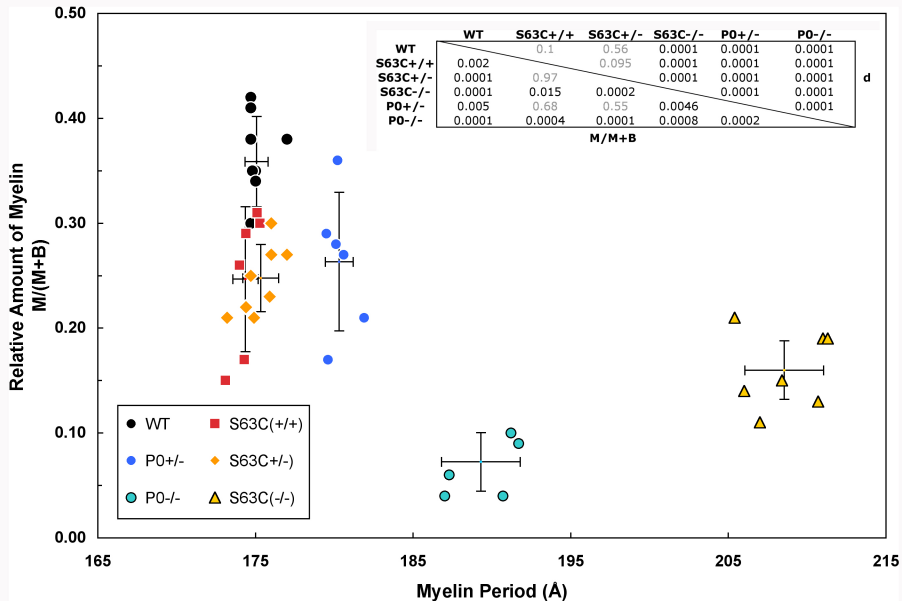

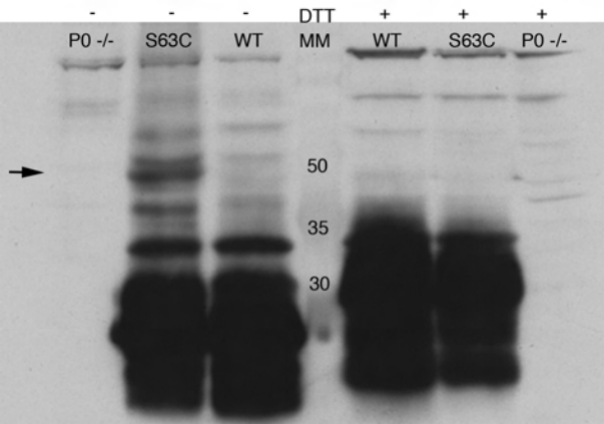

# Supplementary Dataset

Below are the matched peptides and raw spectra from MALDI-TOF analysis of the P0wt and Dimers bands that were excised as shown in Figure 5C.

## Sample wt P0

(see Figure 5C for image of Coumassie Blue-stained gel)

# Mascot Search Results MALDI-TOF analysis

### F002306.dat

Match to: [gi|162139829](#) Score: 102 Expect: 1.4e-005  
myelin protein zero [Mus musculus]

Nominal mass ( $M_r$ ): 27634; Calculated pI value: 9.50  
NCBI BLAST search of [gi|162139829](#) against nr  
Unformatted [sequence string](#) for pasting into other applications

Taxonomy: [Mus musculus](#)

Variable modifications: Carbamidomethyl (C), Oxidation (M), Nethylmaleimide (C)  
Cleavage by Trypsin: cuts C-term side of KR unless next residue is P  
Number of mass values searched: 18  
Number of mass values matched: 10  
Sequence Coverage: 21%

Matched peptides shown in **Bold Red**

1 MAPGAPSSSP SPILAALLFS SLVLSPALAI VVYTDREIYG AVGSQVTLHC  
51 SFWSSEWVSD DISFTWR**YQP EGGRDAISIF HYAKGQPYID EVGTFKERIQ**  
101 **WVGDP**RWKDG SIVIHNLDYS DNGTFTCDVK NPPDIVGKTS QVTLYVFEKV  
151 PTRYGVVLGA VIGGILGVVL LLLLLFYLR YCWLRRQAAL QRRLSAMEKG  
201 RFHKSSKDSS KR**GRQTPVLY AMLDHSR**STK AASEKSKGL GESRKDKK

| Start - End | Observed  | Mr (expt) | Mr (calc) | Delta   | Miss | Sequence                         |
|-------------|-----------|-----------|-----------|---------|------|----------------------------------|
| 68 - 74     | 806.3603  | 805.3530  | 805.3718  | -0.0188 | 0    | R.YQPEGGR.D                      |
| 68 - 84     | 1951.8865 | 1950.8792 | 1950.9587 | -0.0795 | 1    | R.YQPEGGRDAISIFHYAK.G            |
| 75 - 84     | 1164.5716 | 1163.5643 | 1163.5975 | -0.0331 | 0    | R.DAISIFHYAK.G                   |
| 85 - 96     | 1353.6243 | 1352.6170 | 1352.6612 | -0.0442 | 0    | K.GQPYIDVGTGTFK.E                |
| 85 - 98     | 1638.7536 | 1637.7463 | 1637.8049 | -0.0585 | 1    | K.GQPYIDVGTGTFKER.I              |
| 99 - 106    | 970.4862  | 969.4789  | 969.5032  | -0.0243 | 0    | R.IQWVGDP.R.W                    |
| 213 - 227   | 1743.8278 | 1742.8205 | 1742.8886 | -0.0681 | 1    | R.GRQTPVLYAMLDSR.S               |
| 213 - 227   | 1759.8299 | 1758.8226 | 1758.8835 | -0.0609 | 1    | R.GRQTPVLYAMLDSR.S Oxidation (M) |
| 215 - 227   | 1530.7194 | 1529.7121 | 1529.7660 | -0.0539 | 0    | R.QTPVLYAMLDSR.S                 |
| 215 - 227   | 1546.7139 | 1545.7066 | 1545.7609 | -0.0543 | 0    | R.QTPVLYAMLDSR.S Oxidation (M)   |

No match to: 829.3810, 845.3715, 1323.6152, 1482.7115, 1513.6939, 1529.6948, 1562.7154, 1608.7438

**Sample Dimers**

(see Figure 5C for image of Coumassie Blue-stained gel)

**Mascot Search Results MALDI-TOF analysis****F002308.dat**Match to: [gi|162139829](#) Score: **80** Expect: **0.002****myelin protein zero [Mus musculus]**Nominal mass ( $M_r$ ): **27634**; Calculated pI value: **9.50**NCBI BLAST search of [gi|162139829](#) against nrUnformatted [sequence string](#) for pasting into other applicationsTaxonomy: [Mus musculus](#)Variable modifications: **Carbamidomethyl** (C), Oxidation (M), **Nethylmaleimide** (C)

Cleavage by Trypsin: cuts C-term side of KR unless next residue is P

Number of mass values searched: **12**Number of mass values matched: **7**Sequence Coverage: **18%**Matched peptides shown in **Bold Red**

**1** MAPGAPSSSP SPILAALLFS SLVLSPALAI VVYTDREIYG AVGSQVTLHC  
**51** SFWSSEWVSD DISFTWRYQP EGGR**DAISIF HYAKGQPYID EVGTFKERIQ**  
**101** **WVGDP**RWKDG SIVIHNLDYS DNGTFTCDVK NPPDIVGKTS QVTLYVFEKV  
**151** PTRYGVVLGA VIGGILGVVL LLLLLFYLR YCWLRRQAAL QRRLSAMEKG  
**201** RFHKSSKDSS KR**GRQTPVLY AMLDHSR**STK AASEKSKGL GESRKDKK

| Start - End | Observed  | Mr (expt) | Mr (calc) | Delta   | Miss | Sequence                          |
|-------------|-----------|-----------|-----------|---------|------|-----------------------------------|
| 75 - 84     | 1164.6060 | 1163.5987 | 1163.5975 | 0.0013  | 0    | R.DAISIFHYAK.G                    |
| 85 - 96     | 1353.6637 | 1352.6564 | 1352.6612 | -0.0048 | 0    | K.GQPYIDEVGTFFK.E                 |
| 85 - 98     | 1638.8014 | 1637.7941 | 1637.8049 | -0.0107 | 1    | K.GQPYIDEVGTFFKER.I               |
| 99 - 106    | 970.5164  | 969.5091  | 969.5032  | 0.0059  | 0    | R.IQWVGDP.R.W                     |
| 213 - 227   | 1759.8710 | 1758.8637 | 1758.8835 | -0.0198 | 1    | R.GRQTPVLYAMLDHSR.S Oxidation (M) |
| 215 - 227   | 1530.7569 | 1529.7496 | 1529.7660 | -0.0164 | 0    | R.QTPVLYAMLDHSR.S                 |
| 215 - 227   | 1546.7606 | 1545.7533 | 1545.7609 | -0.0076 | 0    | R.QTPVLYAMLDHSR.S Oxidation (M)   |

**No match to:** 1375.6760, 1482.7115, 1529.7383, 1562.7652, 1804.9244



sample wt P0

# Mascot Search Results MALDI-TOF analysis

F002595.dat

Match to: [gi|162139829](#) Score: 128 Expect: 3.5e-008

**myelin protein zero [Mus musculus]**

Nominal mass (M<sub>r</sub>): 27634; Calculated pI value: 9.50

NCBI BLAST search of [gi|162139829](#) against nr

Unformatted [sequence string](#) for pasting into other applications

Taxonomy: [Mus musculus](#)

Variable modifications: Carbamidomethyl (C), Oxidation (M), Nethylmaleimide (C)

Cleavage by Trypsin+AspN, a mixture of enzymes:

cuts C-term side of KR unless next residue is P

cuts N-term side of DB

Number of mass values searched: 49

Number of mass values matched: 19

Sequence Coverage: 46%

Matched peptides shown in **Bold Red**

1 MAPGAPSSSP SPILAALLFS SLVLSPALAI VVYTDREIYG AVGSQVTLHC  
 51 SFWSSEWVSD DISFTWRYP EGGRDAISIF HYAKGQPYID EVGTFKERIQ  
 101 WVGDPWKDG SIVIHNL DYS DNGTFTCDVK NPPDIVGKTS QVTLYVFEKV  
 151 PTRYGVV LGA VIGGILGVV LLLLLFYLR YCWLRRQAAL QRRLSAMEKG  
 201 RFHKSSKDSS KRGRQTPVLY AMLDHSRSTK AASEKSKGL GESRKDKK

| Start - End | Observed  | Mr (expt) | Mr (calc) | Delta   | Miss | Sequence                       |                 |
|-------------|-----------|-----------|-----------|---------|------|--------------------------------|-----------------|
| 35 - 59     | 2900.2744 | 2899.2671 | 2899.3235 | -0.0563 | 1    | T.DREIYGAVGSQVTLHCSFWSSEWVS.D  | Carbamidomethyl |
| (C) 35 - 60 | 3015.3822 | 3014.3749 | 3014.3504 | 0.0245  | 2    | T.DREIYGAVGSQVTLHCSFWSSEWVSD.D | Carbamidomethyl |
| (C) 61 - 67 | 924.4733  | 923.4660  | 923.4501  | 0.0159  | 0    | D.DISFTWR.Y                    |                 |
| 61 - 74     | 1711.8349 | 1710.8276 | 1710.8114 | 0.0163  | 1    | D.DISFTWRYP EGGR.D             |                 |
| 68 - 74     | 806.3858  | 805.3785  | 805.3718  | 0.0067  | 0    | R.YQPEGGR.D                    |                 |
| 75 - 84     | 1164.6115 | 1163.6042 | 1163.5975 | 0.0068  | 0    | R.DAISIFHYAK.G                 |                 |
| 75 - 89     | 1722.8847 | 1721.8774 | 1721.8777 | -0.0002 | 1    | R.DAISIFHYAKGQPYI.D            |                 |
| 90 - 98     | 1080.5424 | 1079.5351 | 1079.5247 | 0.0104  | 1    | I.DEVGTFFKER.I                 |                 |
| 90 - 103    | 1663.8466 | 1662.8393 | 1662.8365 | 0.0028  | 2    | I.DEVGTFFKERIQWVG.D            |                 |
| 97 - 103    | 887.4823  | 886.4750  | 886.4661  | 0.0090  | 1    | K.ERIQWVG.D                    |                 |
| 104 - 117   | 1649.8355 | 1648.8282 | 1648.8685 | -0.0403 | 2    | G.DPRWKDGSIVIHNL.D             |                 |
| 107 - 117   | 1281.6949 | 1280.6876 | 1280.6877 | -0.0001 | 1    | R.WKDG SIVIHNL.D               |                 |
| 109 - 117   | 967.5218  | 966.5145  | 966.5134  | 0.0011  | 0    | K.DGSIVIHNL.D                  |                 |
| 134 - 149   | 1826.9898 | 1825.9825 | 1825.9825 | 0.0000  | 1    | P.DIVGKTSQVTLYVFEK.V           |                 |
| 212 - 223   | 1420.7867 | 1419.7794 | 1419.7656 | 0.0138  | 2    | K.RGRQTPVLYAML.D               | Oxidation (M)   |
| 213 - 223   | 1248.6858 | 1247.6785 | 1247.6696 | 0.0089  | 1    | R.GRQTPVLYAML.D                |                 |
| 213 - 223   | 1264.6810 | 1263.6737 | 1263.6645 | 0.0092  | 1    | R.GRQTPVLYAML.D                | Oxidation (M)   |
| 215 - 227   | 1530.7668 | 1529.7595 | 1529.7660 | -0.0065 | 1    | R.QTPVLYAML DHSR.S             |                 |
| 215 - 227   | 1546.7778 | 1545.7705 | 1545.7609 | 0.0096  | 1    | R.QTPVLYAML DHSR.S             | Oxidation (M)   |

segnali bassi

No match to: 901.5081, 915.4839, 919.4718, 995.4939, 997.4688, 1050.5302, 1055.4847, 1065.5088, 1112.4938, 1180.5202, 1186.5956, 1195.6026, 1203.6705, 1217.6430, 1235.6543, 1633.8402, 1644.8368, 1661.8276, 1679.8348, 1779.8984, 1782.8508, 1784.8265, 1842.8328, 1858.8251, 1899.8455, 1915.8248, 1967.8691, 1985.8712, 2916.2503, 2931.2802

## sample dimers

## Mascot Search Results MALDI-TOF analysis

## F002582.dat

Match to: [gi|162139829](#) Score: 64 Expect: 0.085

myelin protein zero [Mus musculus]

Nominal mass ( $M_r$ ): 27634; Calculated pI value: 9.50NCBI BLAST search of [gi|162139829](#) against nrUnformatted [sequence string](#) for pasting into other applicationsTaxonomy: [Mus musculus](#)

Variable modifications: Carbamidomethyl (C), Oxidation (M), Nethylmaleimide (C)

Cleavage by Trypsin+AspN, a mixture of enzymes:

cuts C-term side of KR unless next residue is P

cuts N-term side of DB

Number of mass values searched: 27

Number of mass values matched: 9

Sequence Coverage: 23%

Matched peptides shown in **Bold Red**

1 MAPGAPSSSP SPILAALLFS SLVLSPALAI VVYTDREIYG AVGSQVTLHC  
 51 SFWSSEWVSD DISFTWR**YQP EGGDAISIF HYAKGQPYID EVGTFKERIQ**  
 101 **WVGDPRWKDG SIVIHNL**DYS DNGTFTCDVK NPPDIVGKTS QVTLYVFEKV  
 151 PTRYGVVPGA VIGGILGVVL LLLLLFYLR YCWLRRQAAL QRRLSAMEKG  
 201 RFHKSSK**DSS KRGRQTPVLY AML**DHSRSTK AASEKSKGL GESRKDKK

| Start - End | Observed  | Mr (expt) | Mr (calc) | Delta  | Miss | Sequence                      |
|-------------|-----------|-----------|-----------|--------|------|-------------------------------|
| 68 - 74     | 806.3907  | 805.3834  | 805.3718  | 0.0116 | 0    | R.YQPEGGR.D                   |
| 75 - 84     | 1164.6126 | 1163.6053 | 1163.5975 | 0.0079 | 0    | R.DAISIFHYAK.G                |
| 90 - 98     | 1080.5429 | 1079.5356 | 1079.5247 | 0.0109 | 1    | I.DEVGTFKER.I                 |
| 90 - 103    | 1663.8522 | 1662.8449 | 1662.8365 | 0.0084 | 2    | I.DEVGTFKERIQWVG.D            |
| 97 - 103    | 887.4859  | 886.4786  | 886.4661  | 0.0126 | 1    | K.ERIQWVG.D                   |
| 107 - 117   | 1281.7017 | 1280.6944 | 1280.6877 | 0.0067 | 1    | R.WKDGSIIVHNL.D               |
| 109 - 117   | 967.5257  | 966.5184  | 966.5134  | 0.0050 | 0    | K.DGSIIVHNL.D                 |
| 208 - 214   | 805.4322  | 804.4249  | 804.4202  | 0.0047 | 2    | K.DSSKRGR.Q                   |
| 213 - 223   | 1264.6792 | 1263.6719 | 1263.6645 | 0.0074 | 1    | R.GRQTPVLYAML.D Oxidation (M) |

No match to: 901.5114, 974.4780, 997.4704, 1112.4943, 1128.4823, 1186.6548, 1203.6710, 1237.6376, 1513.6807, 1560.6874, 1637.7972, 1644.8345, 1661.8231, 1695.8316, 1784.8214, 1899.8443, 1915.8426, 2679.1182

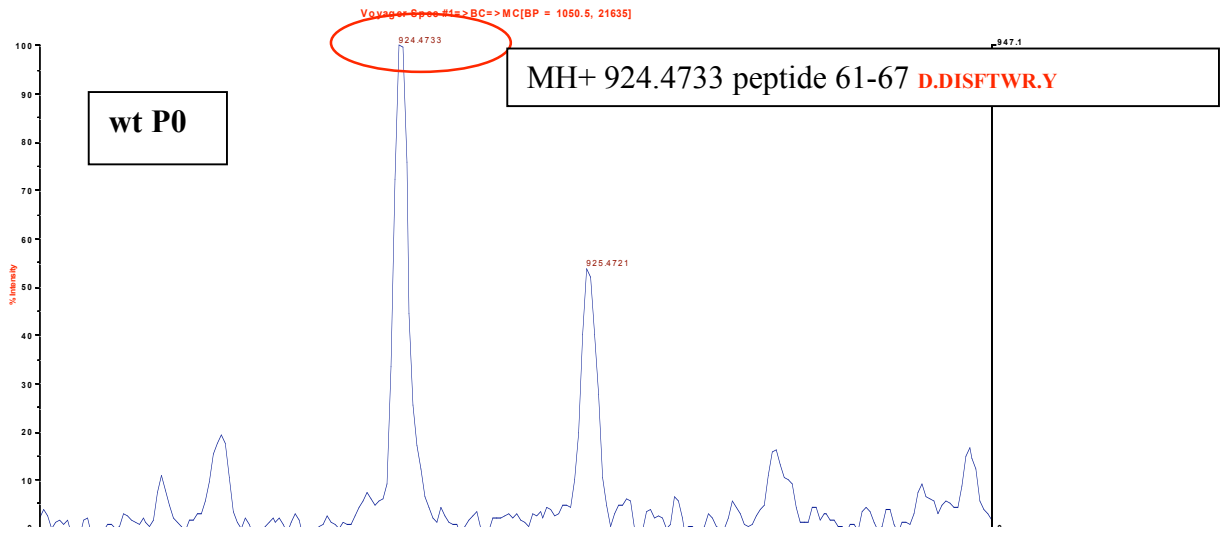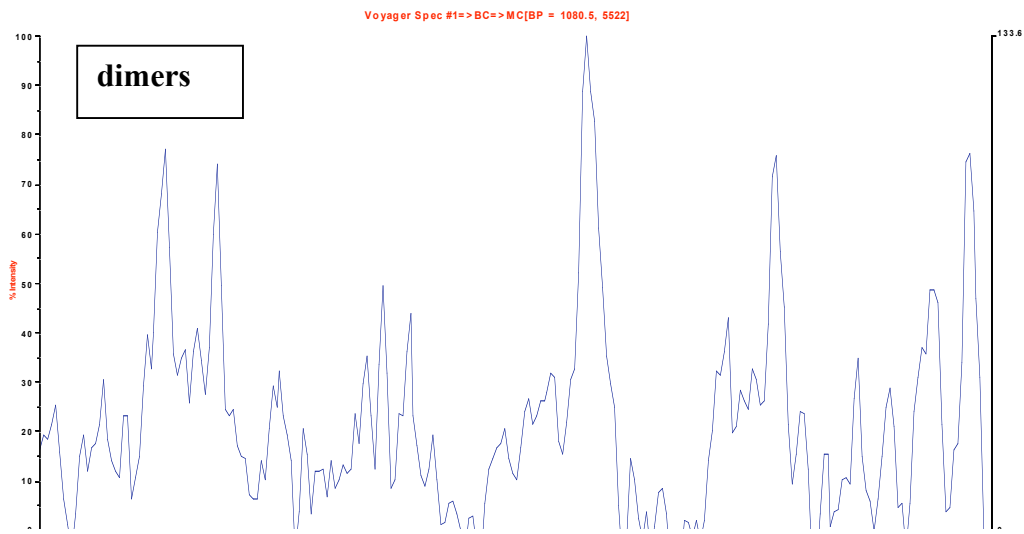

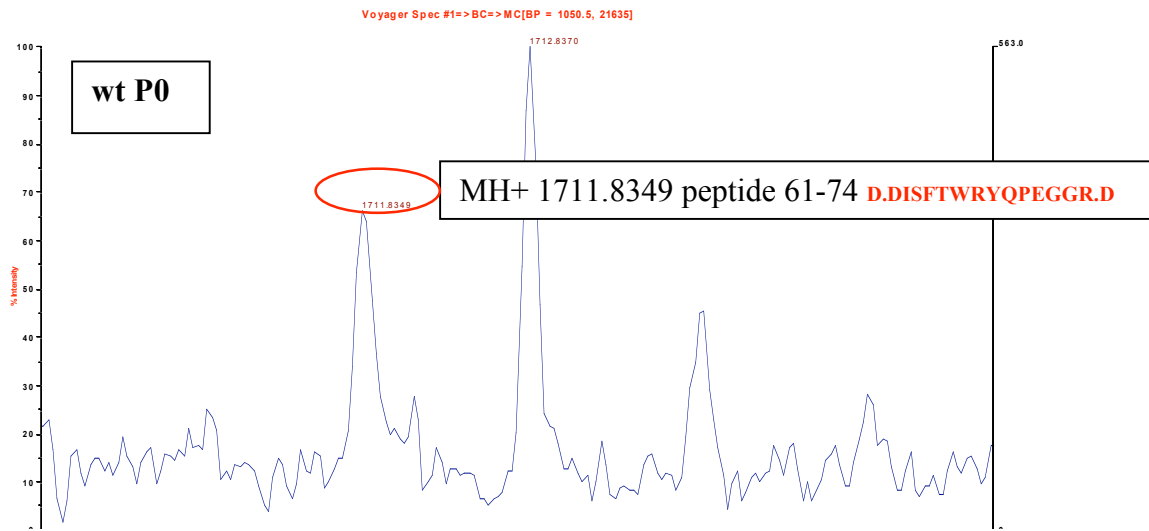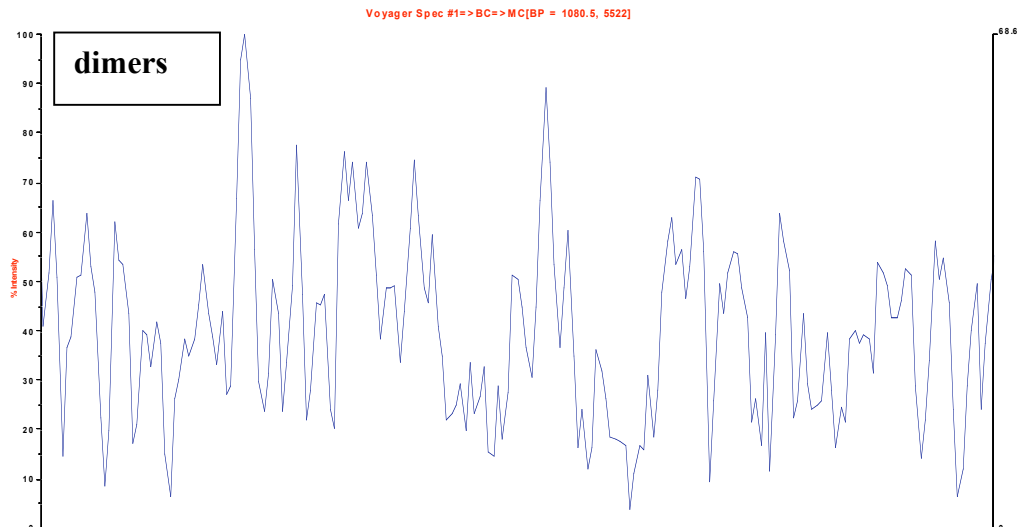

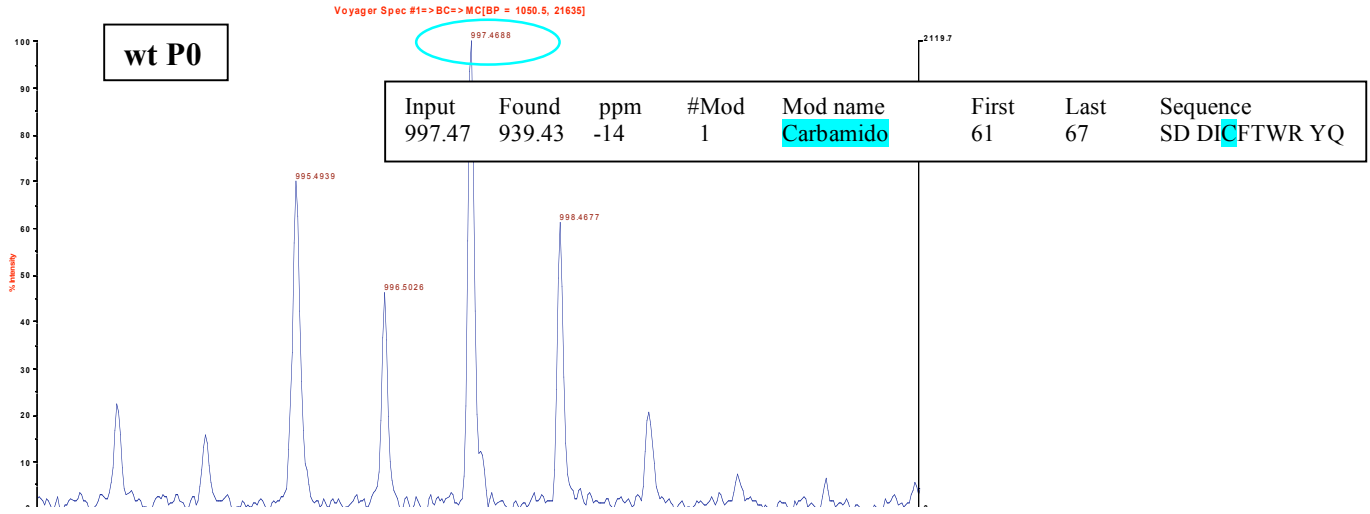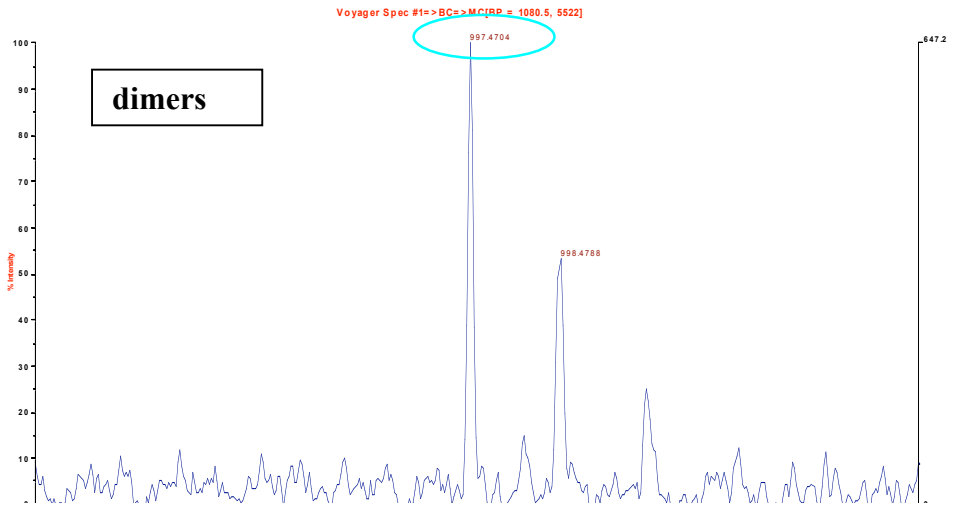

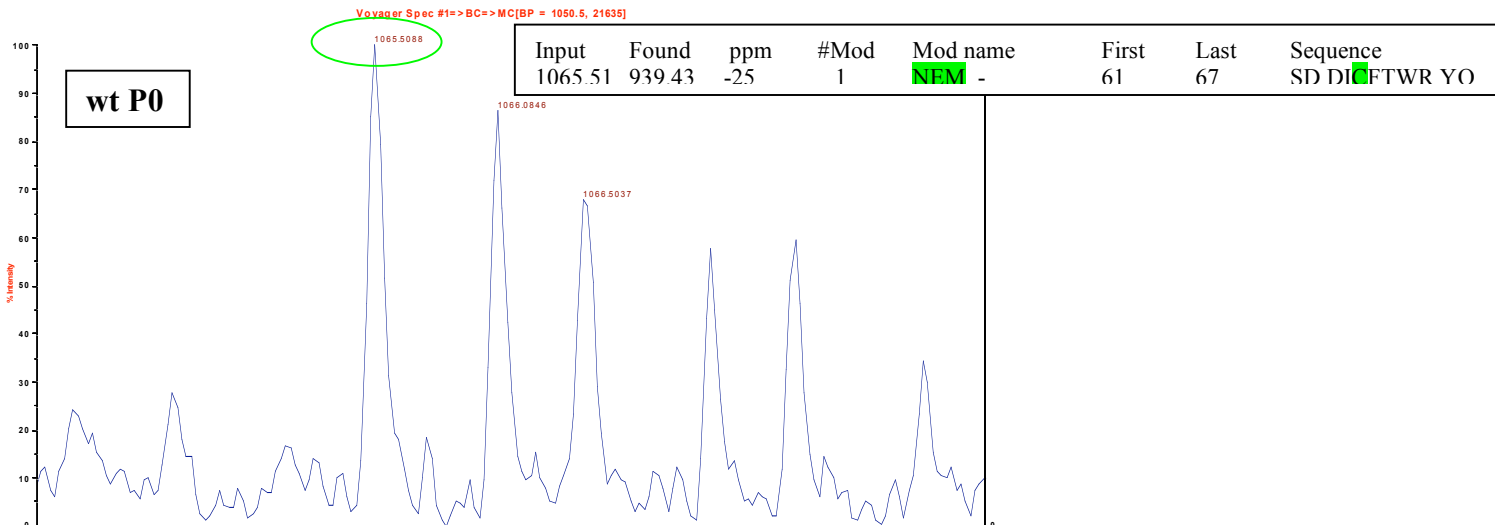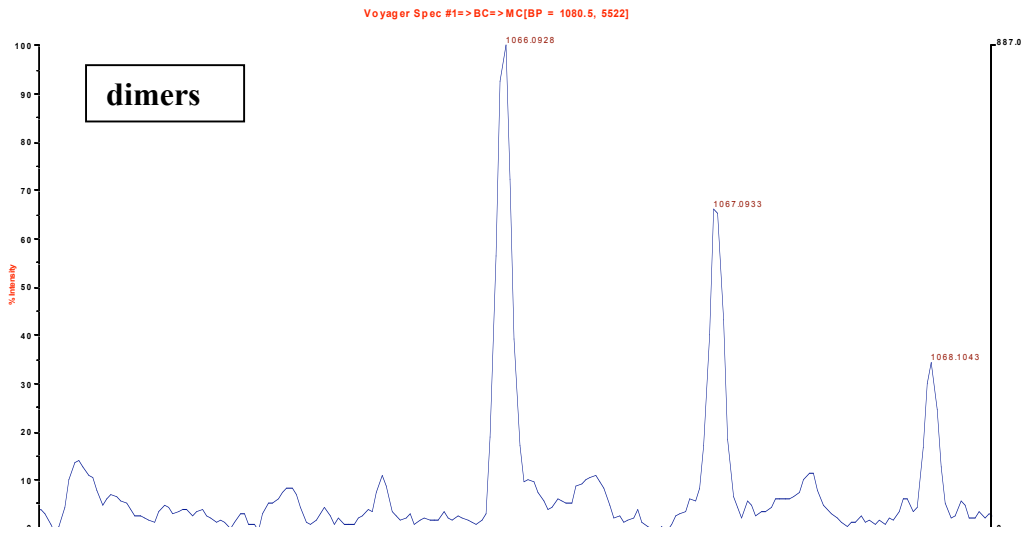

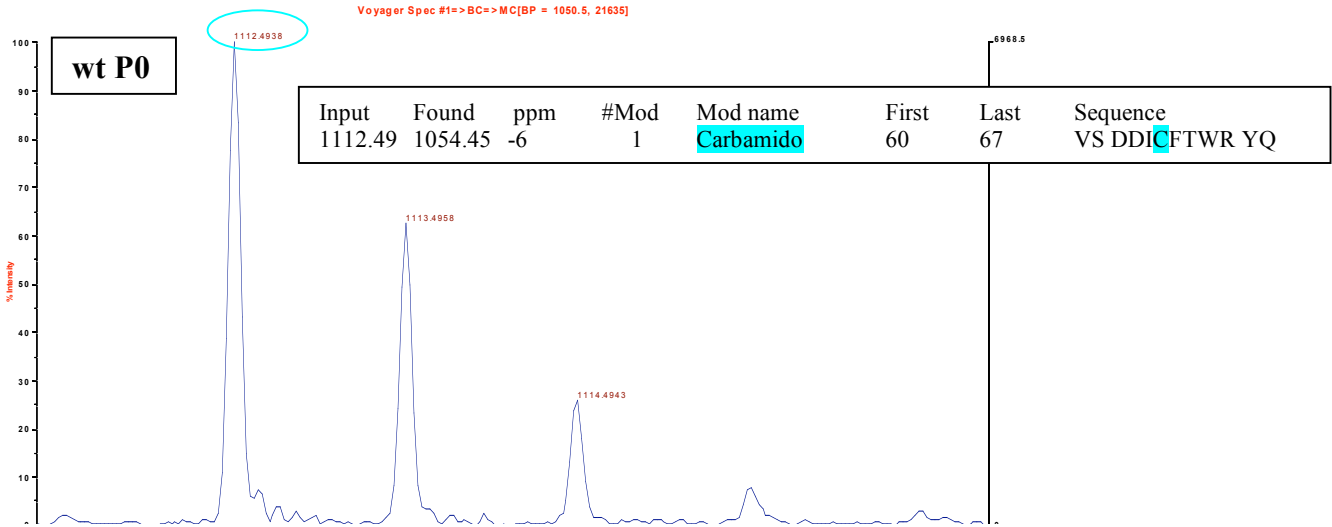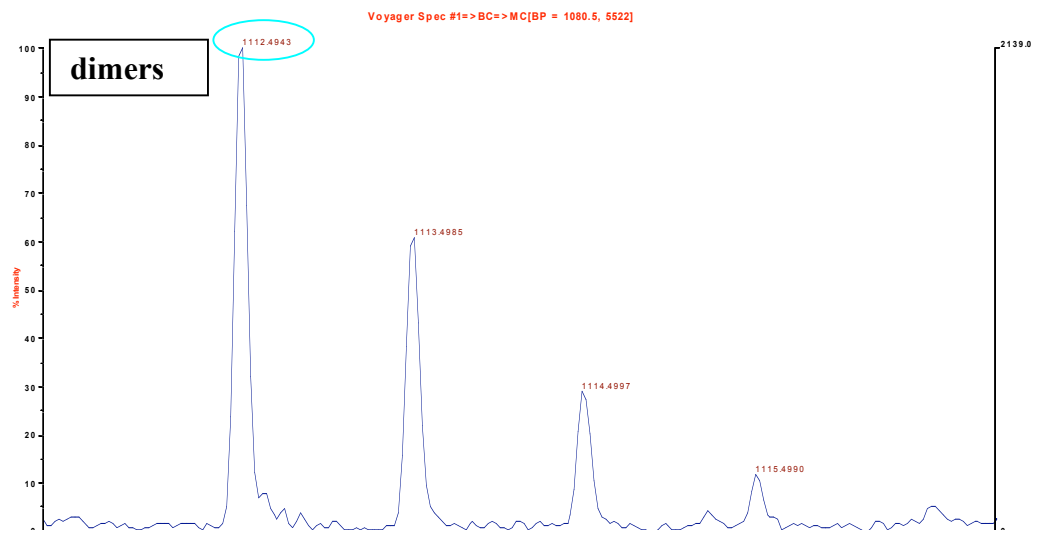

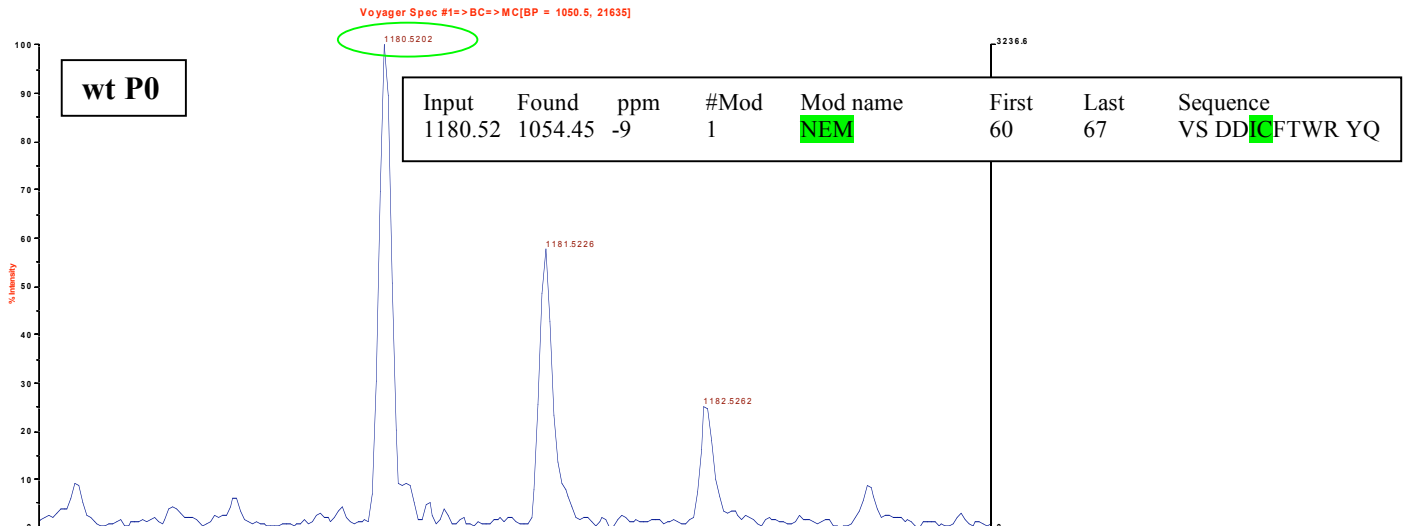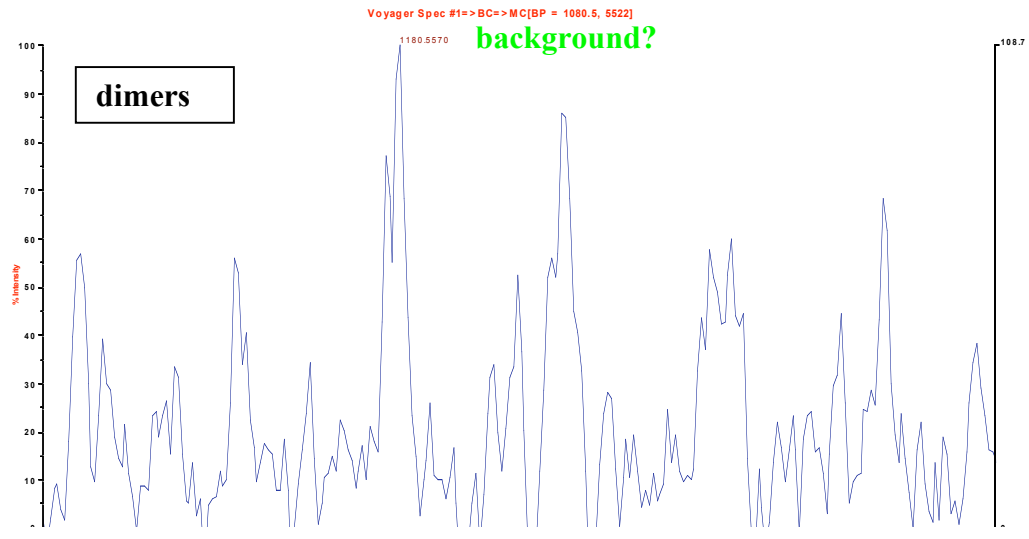



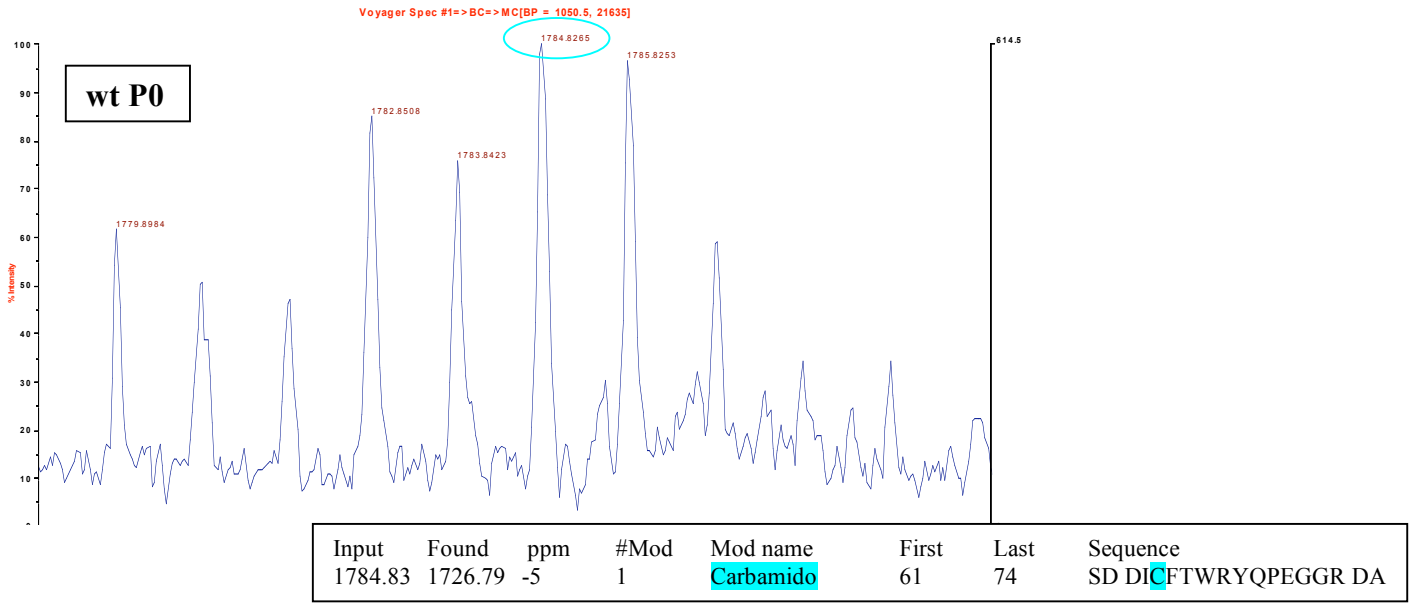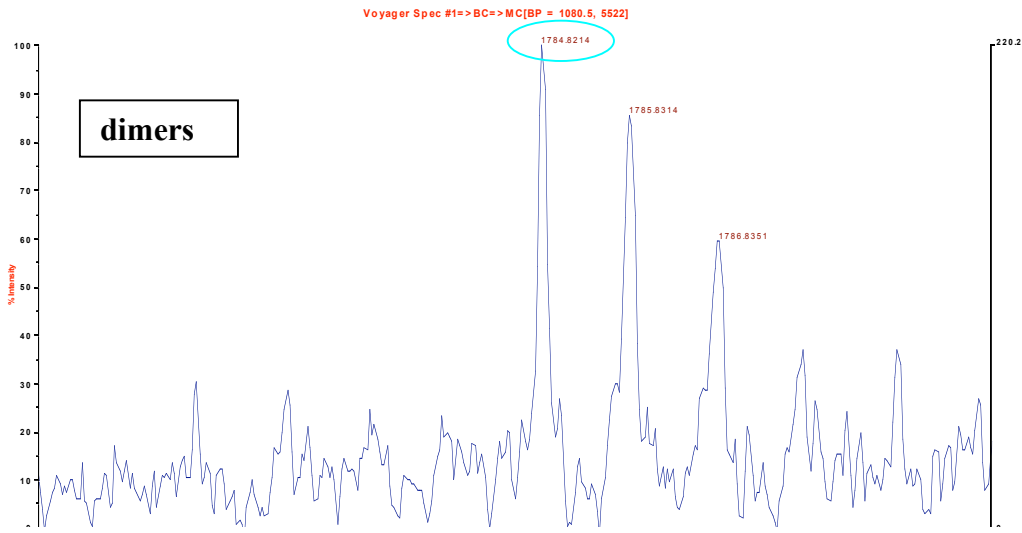

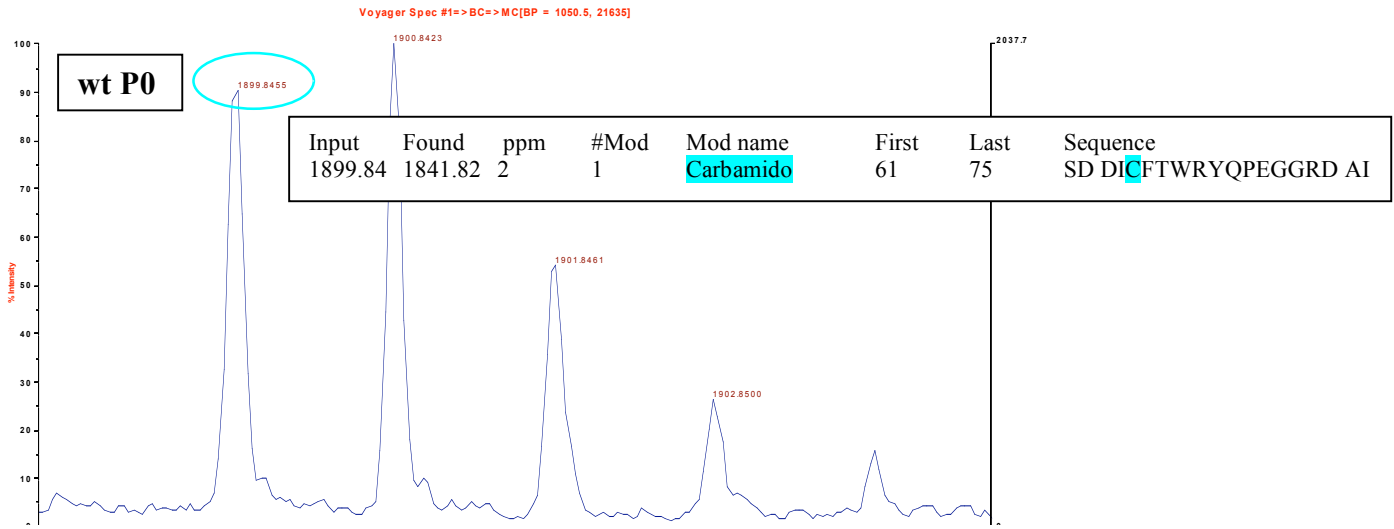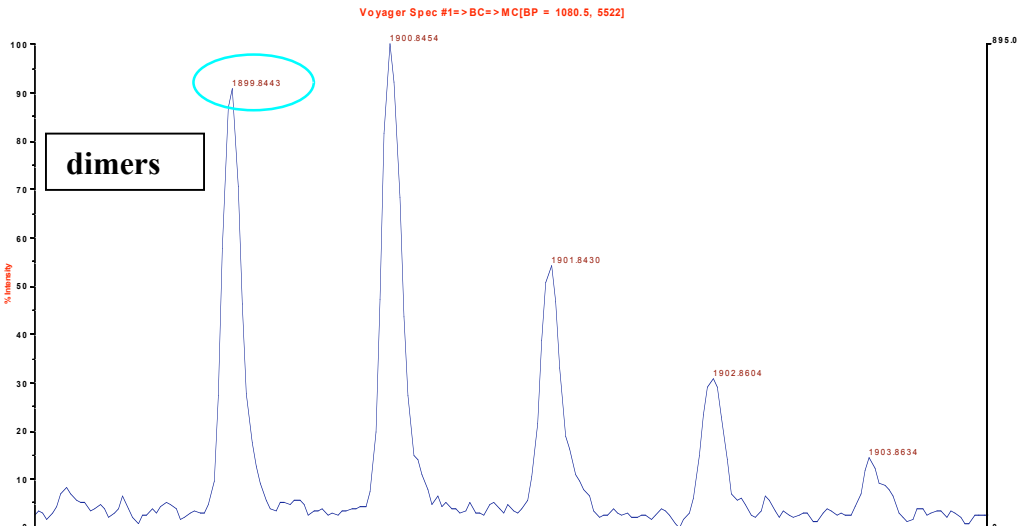

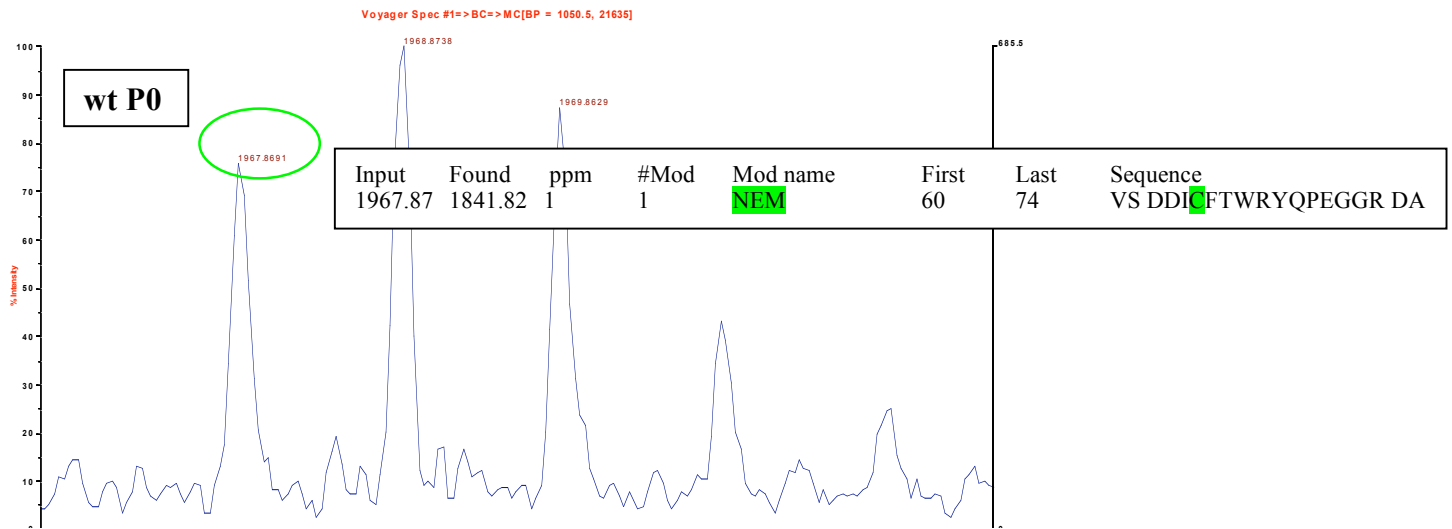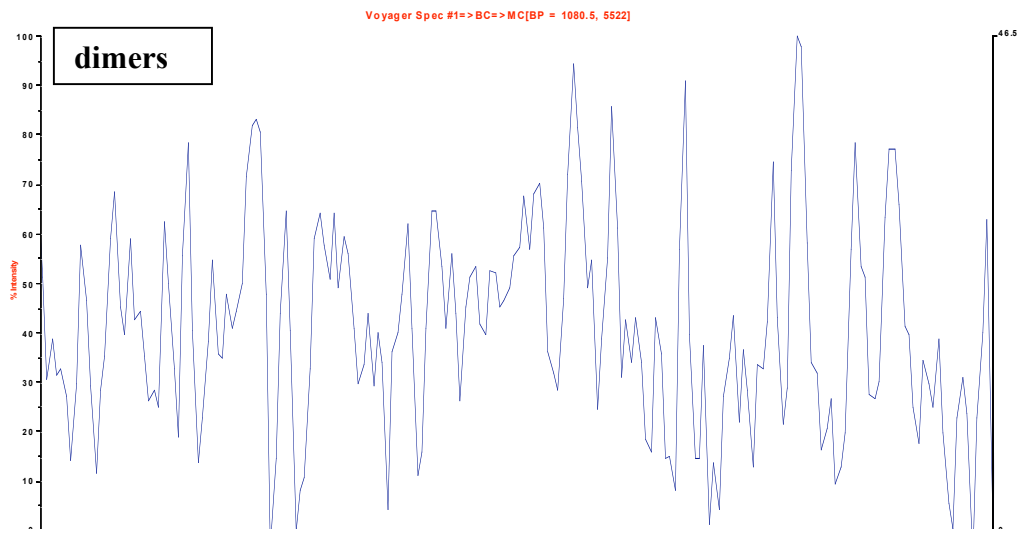

Supplement: supp_M110.166967_jbc.M110.166967-1.pdf [file supp_M110.166967_jbc.M110.166967-1.pdf]
